# Supplementary material
Source: publisher site journal article supplement (https://www.dovepress.com/get_supplementary_file.php?f=461167.docx)
Supplement: Supplementary file 1 [file get_supplementary_file.php]

**Supplementary information**

**Ion doped hollow silica nanoparticles as promising oligonucleotide delivery systems to mesenchymal stem cells**

Chloe Trayford1, Dina M. Ibrahim1 and Sabine van Rijt1*

1MERLN Institute for Technology-Inspired Regenerative Medicine, Maastricht University, P.O. Box 616, 6200 MD Maastricht, the Netherlands

**
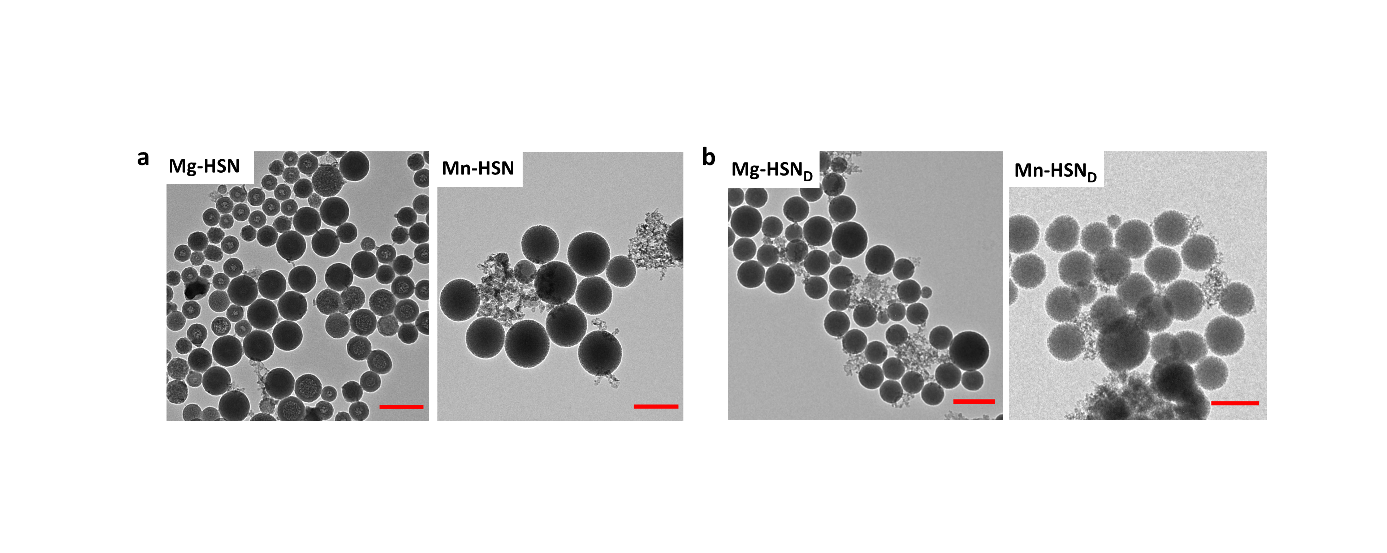
**

***Figure S1.*** *TEM images of HSN doped with* Mgand Mn *(a) without and (b) with DNA-FAM encapsulation. Scale bars are 200 nm.*

*
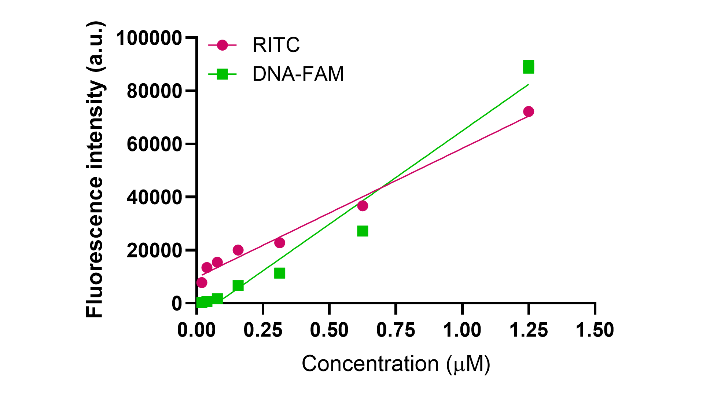
*

***Figure S2****. Rhodamine b isothiocyanate (RITC) and Fluorescein deoxyribose nucleic acid (DNA-FAM) standard curves for the determination of DNA-FAM and RITC concentration in HSN.*

*
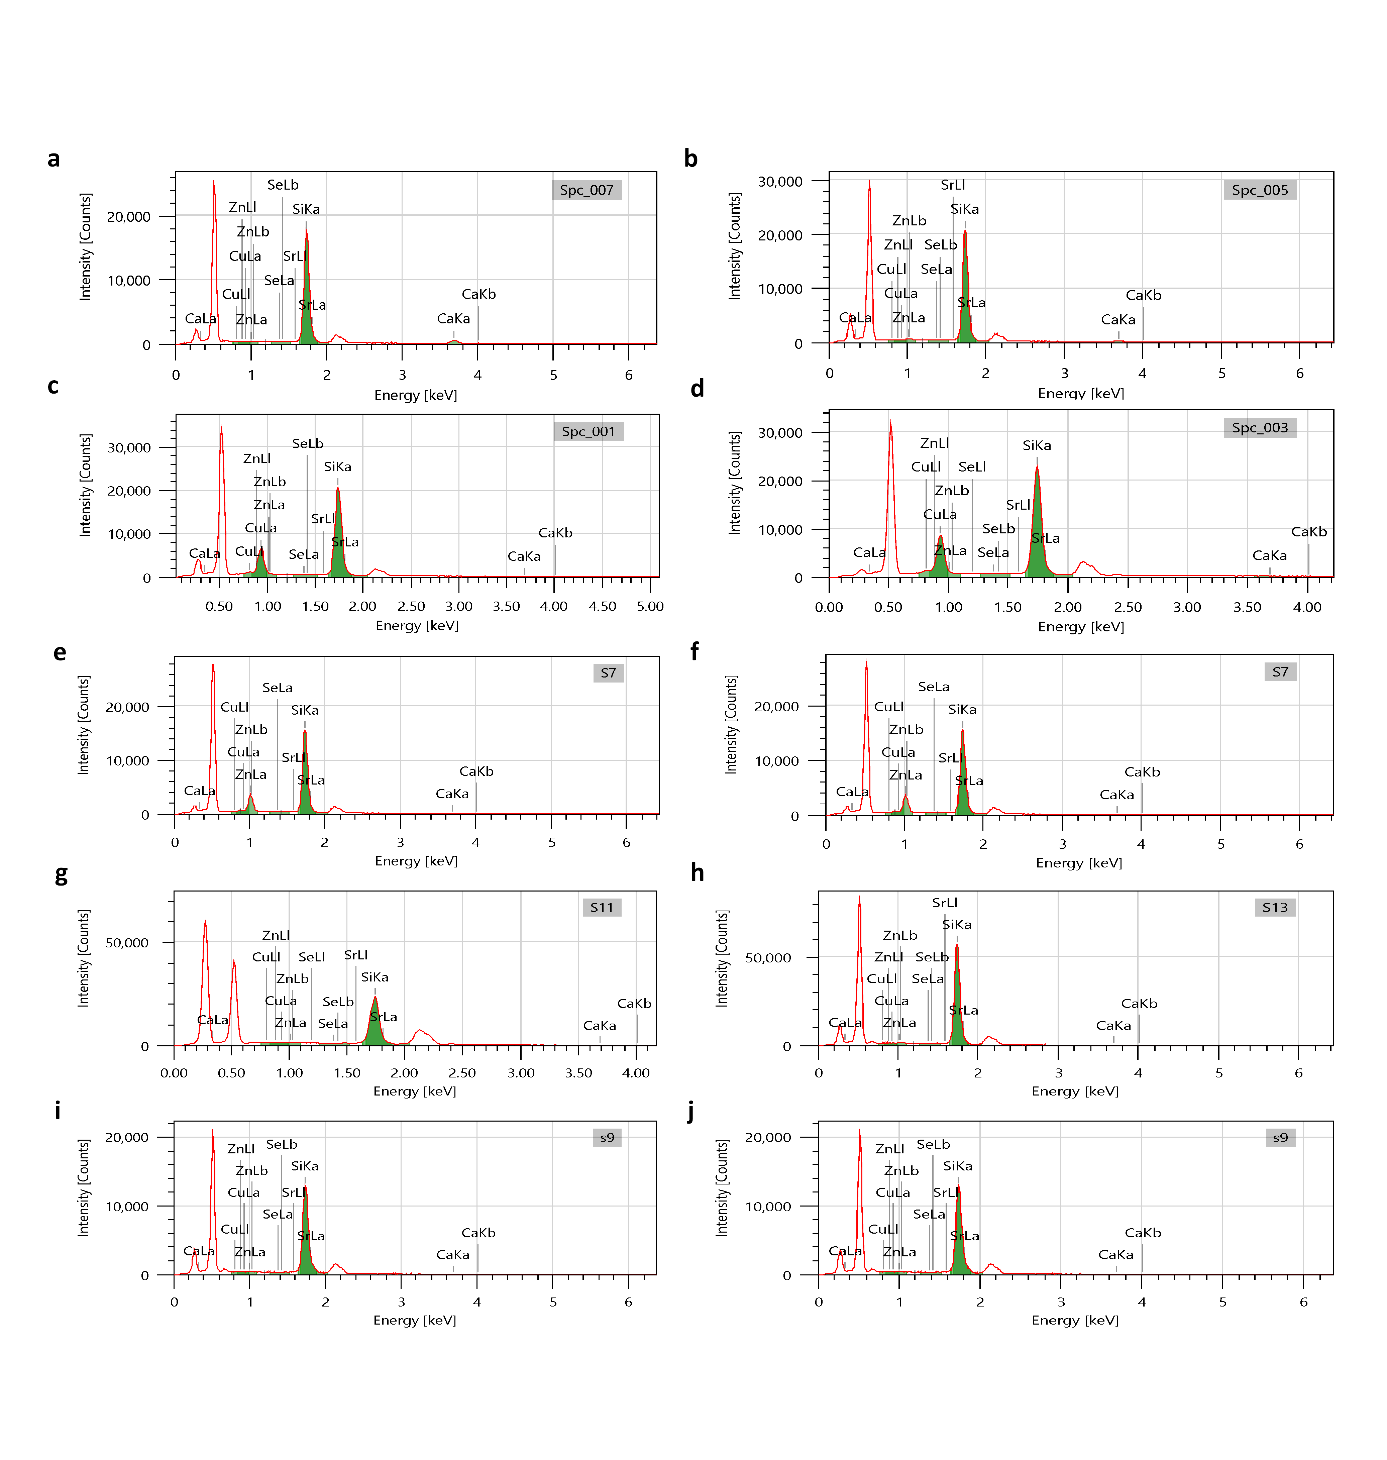
*

***Figure S3****. EDX spectra characterizing ion doping in HSN where (a) Ca-HSN (b) Ca-HSND (c) Cu-HSN (d) Cu-HSND (e) Zn-HSN (f) Zn-HSND (g) Se-HSN (h) Se-HSND (i) Sr-HSN and (j) Sr-HSND*

*
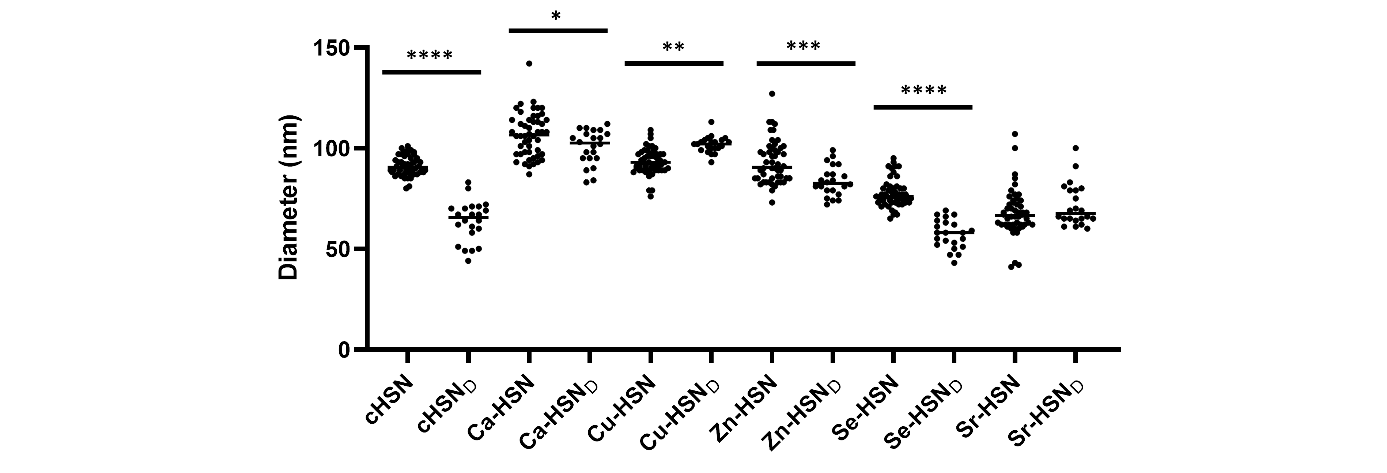
*

***Figure S4.*** *Size comparison of HSN and HSN with encapsulated DNA. Statistical significance is determined comparing HSN and DNA encapsulated HSN pairs where **** = p<0.0001, *** = p<0.001, ** = p<0.01 and * = p<0.05.*

*
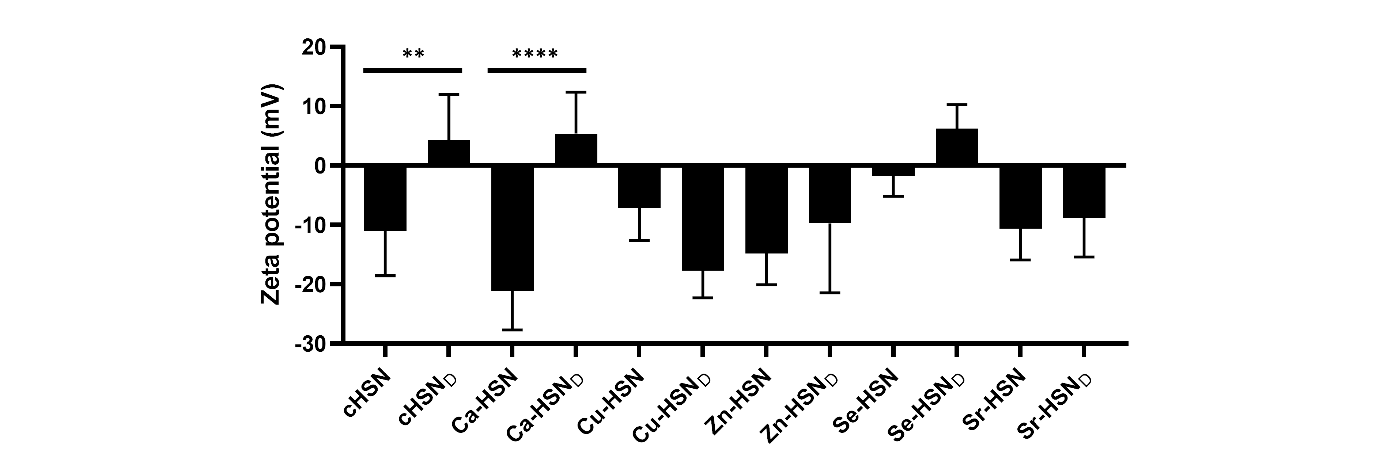
*

***Figure S5.*** *Surface potential comparison of HSN and HSN with encapsulated DNA. Statistical significance is determined comparing HSN and DNA encapsulated HSN pairs where **** = p<0.0001 and ** = p<0.01.*

*
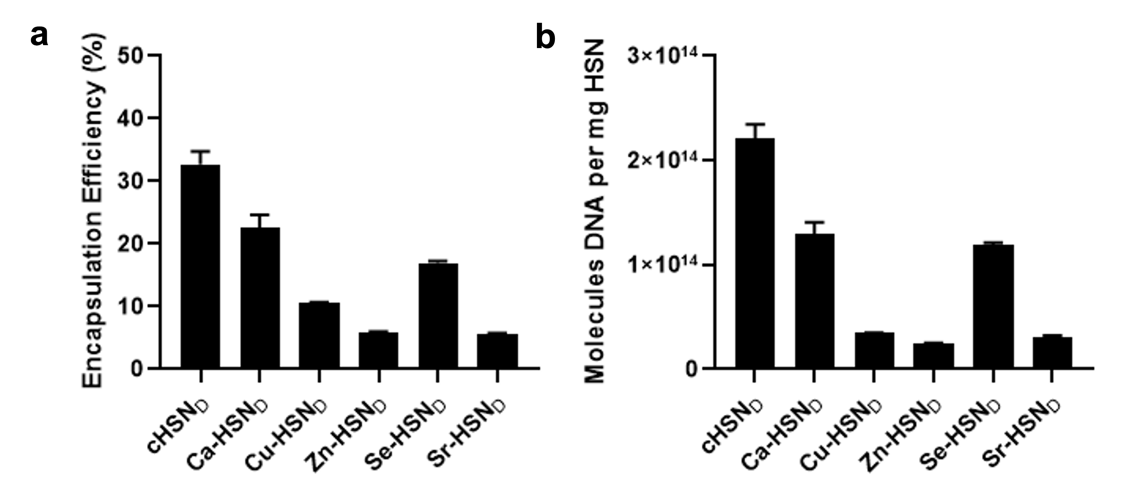
*

***Figure S6****. Quantification of DNA-FAM in HSN where (a) Number of molecules of DNA-FAM in 1mg of HSN and (b) Encapsulation efficiency of DNA-FAM in HSN.*

*
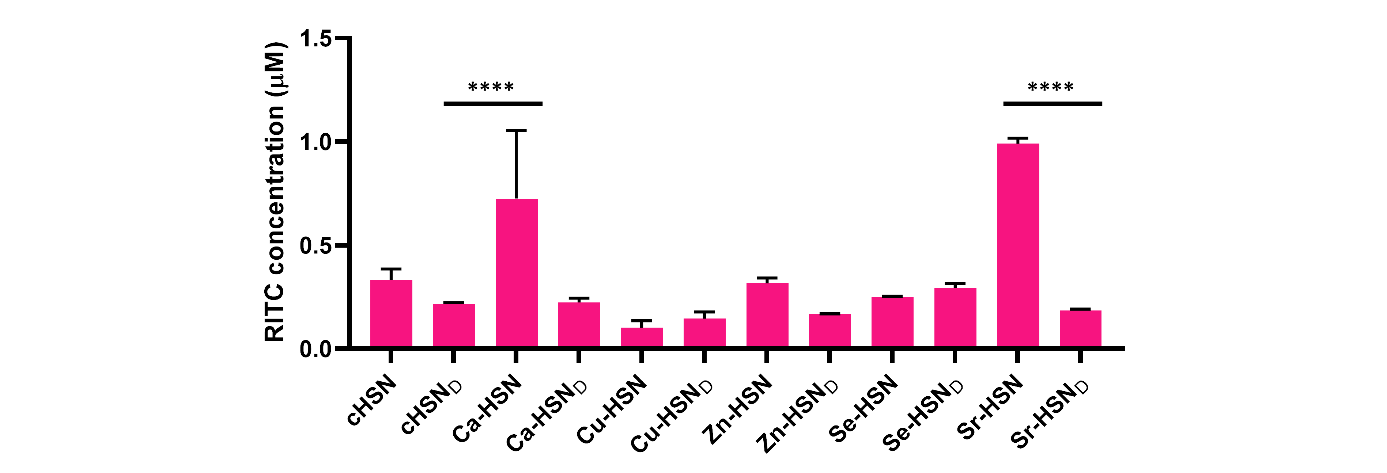
****Figure S7.*** *Comparison of the RITC concentration in HSN and HSN with encapsulated DNA. Statistical significance is determined comparing HSN and DNA encapsulated HSN pairs where **** = p<0.0001.*

*
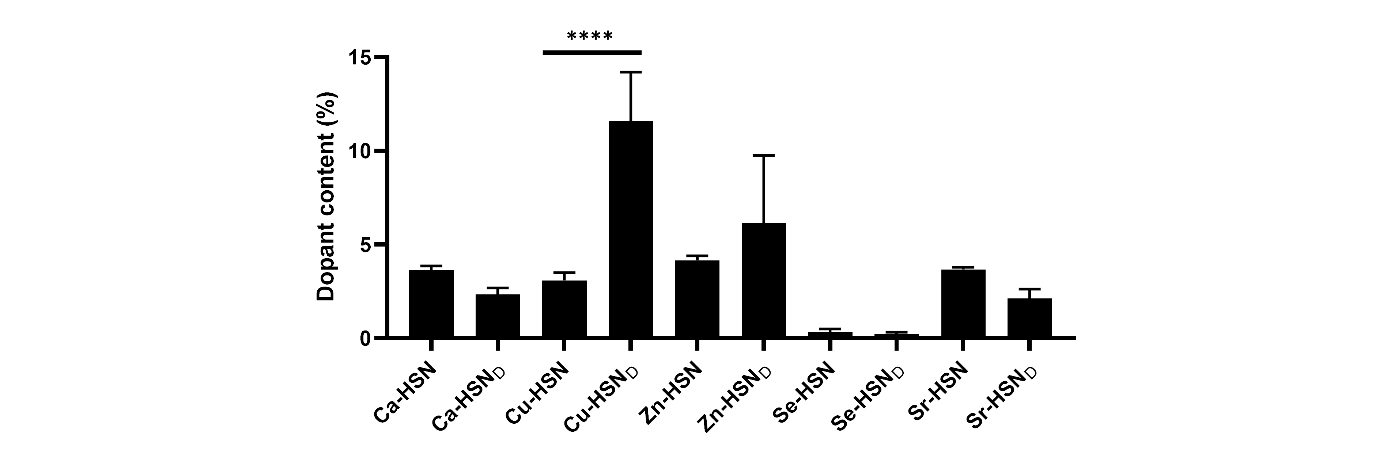
*

***Figure S8.*** *Comparison of the ion doping efficiency in HSN and HSN with encapsulated DNA. Statistical significance is determined comparing HSN and DNA encapsulated HSN pairs where **** = p<0.0001.*


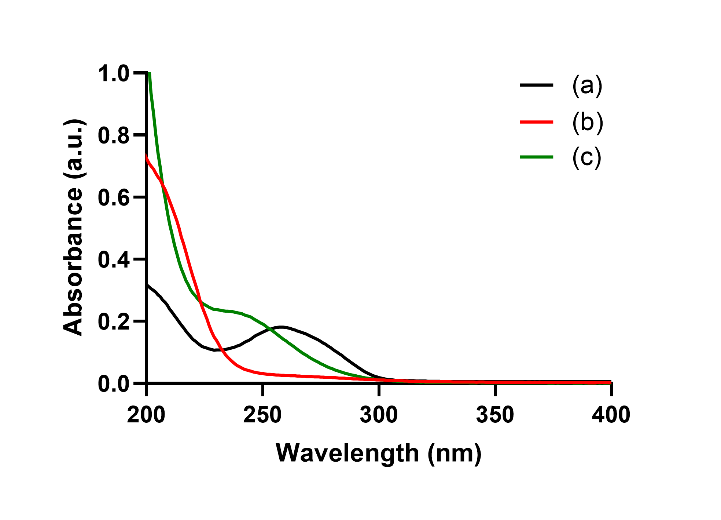


***Figure S9.*** *Absorbance spectra showing shifting absorbance maxima of (a) ssDNA-FAM, (b) ssDNA-FAM in Cu2+ solution and (c) ssDNA-FAM released from Cu-HSND.*

*
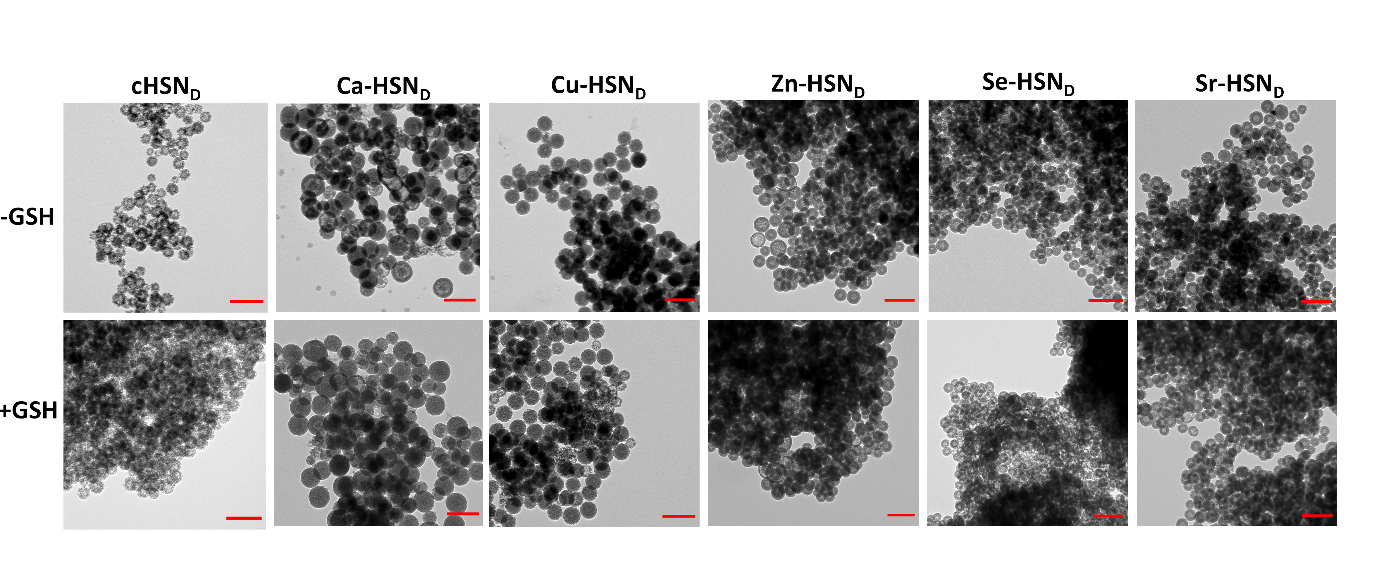
*

***Figure S10.*** *TEM images showing morphology of DNA encapsulated HSN[1, 2] after 7 d in 0mM GSH (-GSH) and 3mM GSH (+GSH) at 1mg/mL. Scale bars are 200 nm.*

*
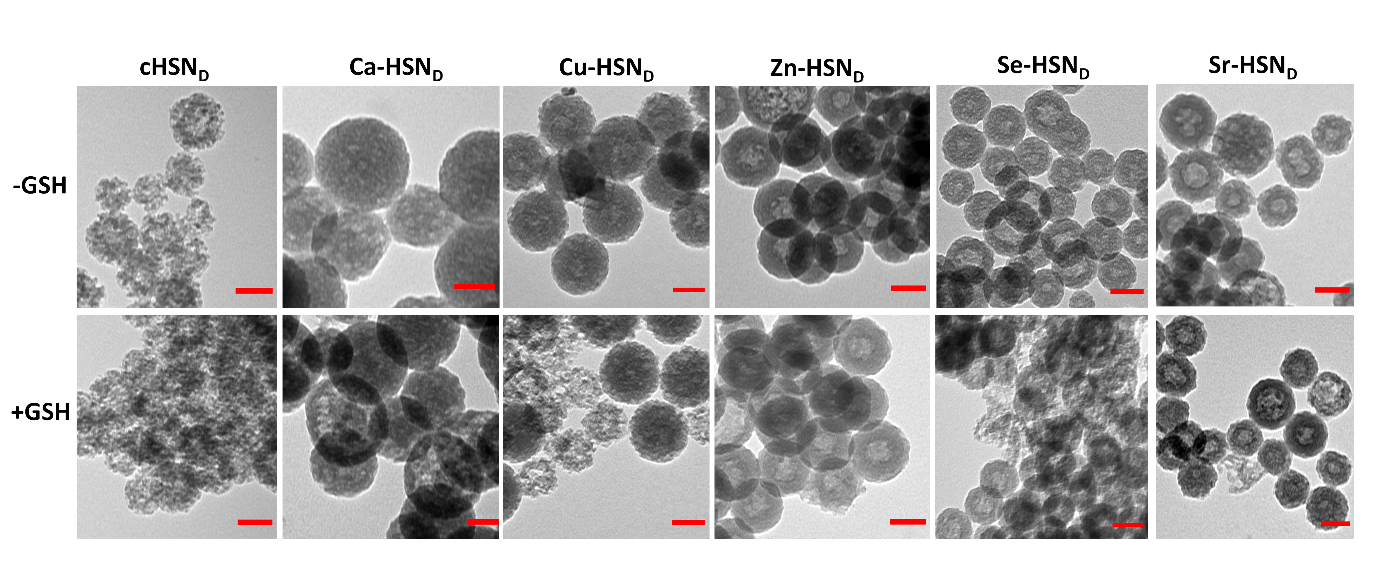
*

***Figure S11.*** *TEM images showing morphology of DNA encapsulated HSN after 7 d in 0mM GSH (-GSH) and 3mM GSH (+GSH) at 1mg/mL. Scale bars are 50 nm.*


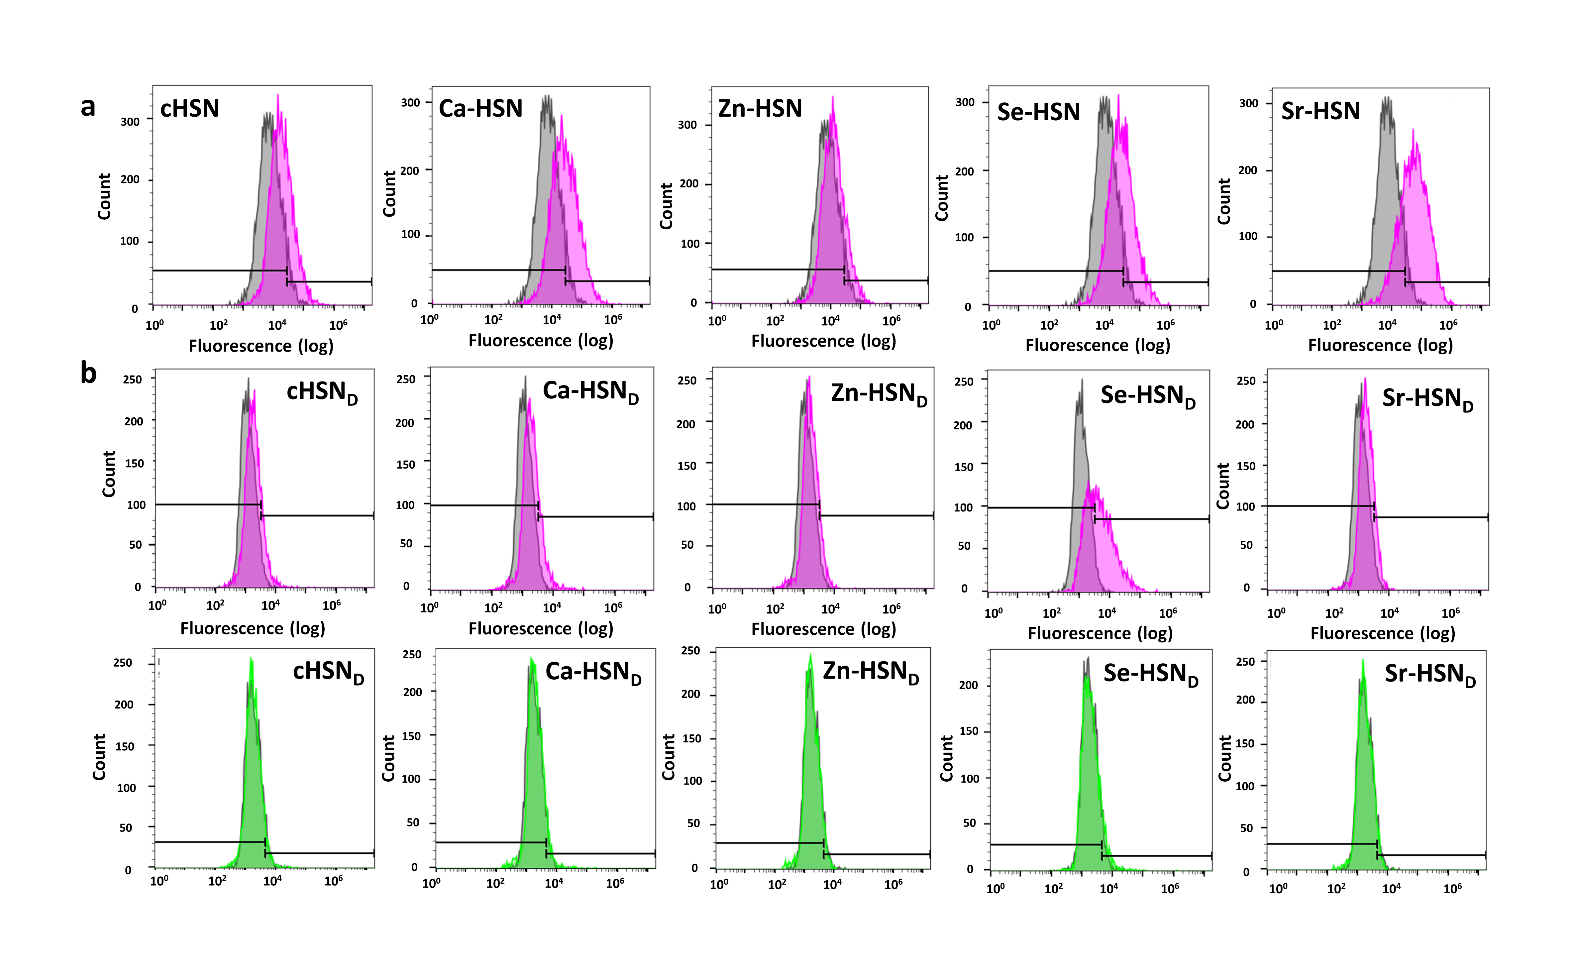


***Figure S12.*** *Flow cytometry uptake histograms after 24 hr incubation with 100µg/mL HSN where (a) HSN and (b) HSND*

5. References

[1] J. Saha *et al.*, "Investigation of Fluorescence Resonance Energy Transfer between Fluorescein and Rhodamine 6G," *Spectrochimica Acta Part A: Molecular and Biomolecular Spectroscopy,* vol. 149, pp. 143-149, 2015/10/05/ 2015, doi: <https://doi.org/10.1016/j.saa.2015.04.027>.

[2] M. Zhu, X. Wang, D. Liu, Z. Yin, F. Li, and J. Zhao, "Fluorescence enhancement of rhodamine B and fluorescein immobilized on optimized ZrO2 nano-porous films," *Journal of Physics and Chemistry of Solids,* vol. 157, p. 110198, 2021/10/01/ 2021, doi: <https://doi.org/10.1016/j.jpcs.2021.110198>.
